# Supplementary material for: A four-methylated mRNA signature-based risk score system predicts survival in patients with hepatocellular carcinoma
Source: Aging (Albany NY). 2019 Jan 10;11(1):160–73. doi: 10.18632/aging.101738 (PMC6339794; doi:10.18632/aging.101738)
Supplement: Supplementary Table [file aging-11-101738-s002.xlsx]

## Sheet: Supplementary File 1
Supplementary Table 1. The clinical characteristics of TCGA.
Variables	Case, n(%)
Age
<65	221(59.6%)
≥65	149(40.2%)
Gender
Female	121(32.6%)
Male	250(67.4%)
Clinical stage
Ⅰ+Ⅱ	257(69.3%)
Ⅲ +Ⅳ	90(24.3%)
T stage
T1+T2	275(74.1%)
T3+T4	90(24.3%)
Grade
G1+G2	232(62.5%)
G3+G3	134(36.1%)
Adjacent hepatic tissue inflammation
None	117(31.5%)
Mild+Severe	117(31.5%)
Alpha-fetoprotein (ng/ml)
≤25	157(42.3%)
>25	121(32.6%)
Child-pugh classification
A	217(58.5%)
B+C	22(5.9%)
Fibrosis
No	74(19.9%)
Yes	138(37.2%)
Family history
No	208(56.1%)
Yes	112(30.2%)
BMI
<25	177(47.7%)
≥25	158(42.6%)
HCC risk factors
None	91(24.5%)
Yes	261(70.4%)
